# Supplementary material for: Global Sensitivity Analysis of simulated polarimetric remote sensing observations over snow
Source: Copernicus journal article supplement (doi:10.5194/egusphere-2023-3023), 2024-01-12

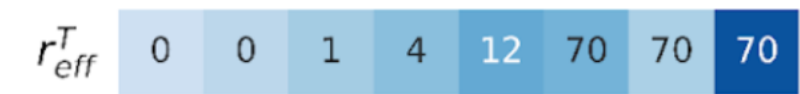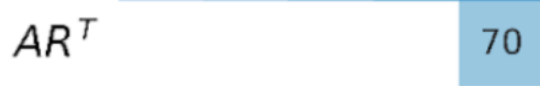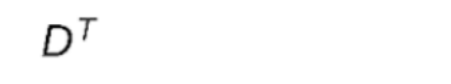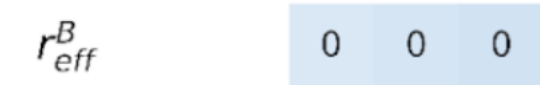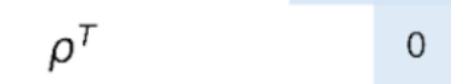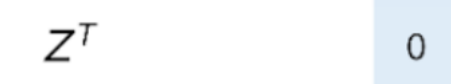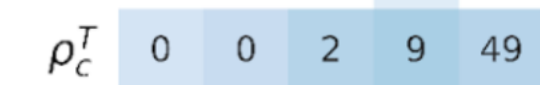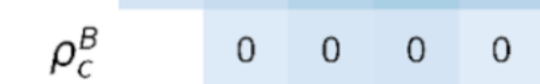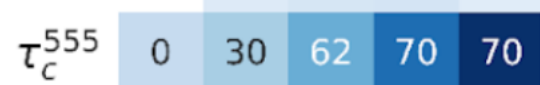

411 470 555 670 864 1589 2112 2266

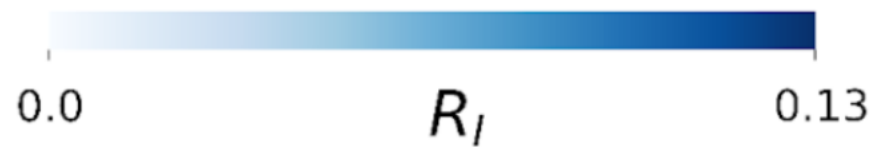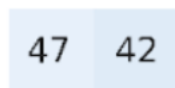

411 470 555 670 864 1589 2112 2266

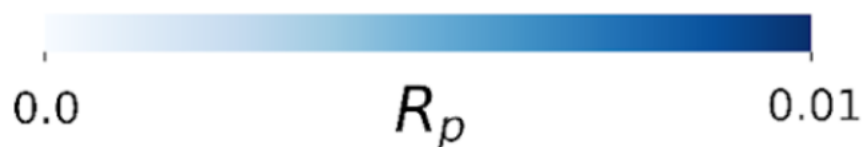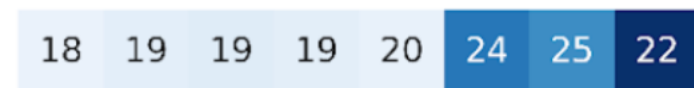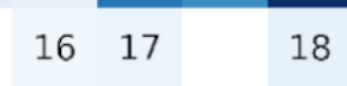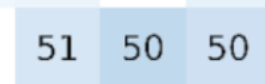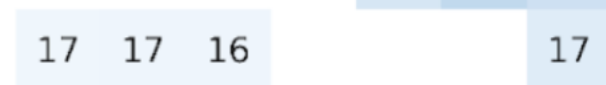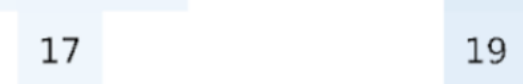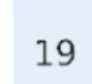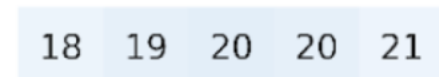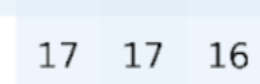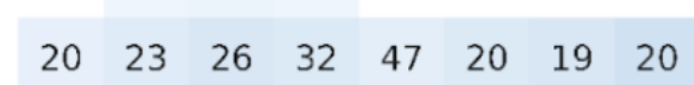

411 470 555 670 864 1589 2112 2266

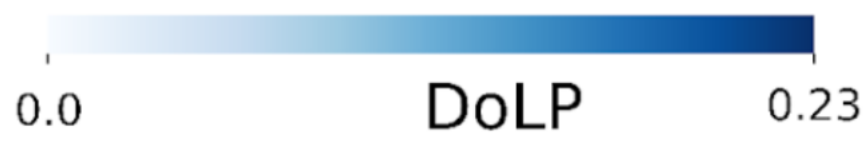

Supplement: Supplementary file [file egusphere-2023-3023-AC1-supplement.pdf]
