# Supplementary material for: Global Sensitivity Analysis of simulated polarimetric remote sensing observations over snow
Source: Copernicus journal article supplement (doi:10.5194/egusphere-2023-3023), 2024-01-12
Supplement: Supplementary file [file egusphere-2023-3023-AC2-supplement.zip]

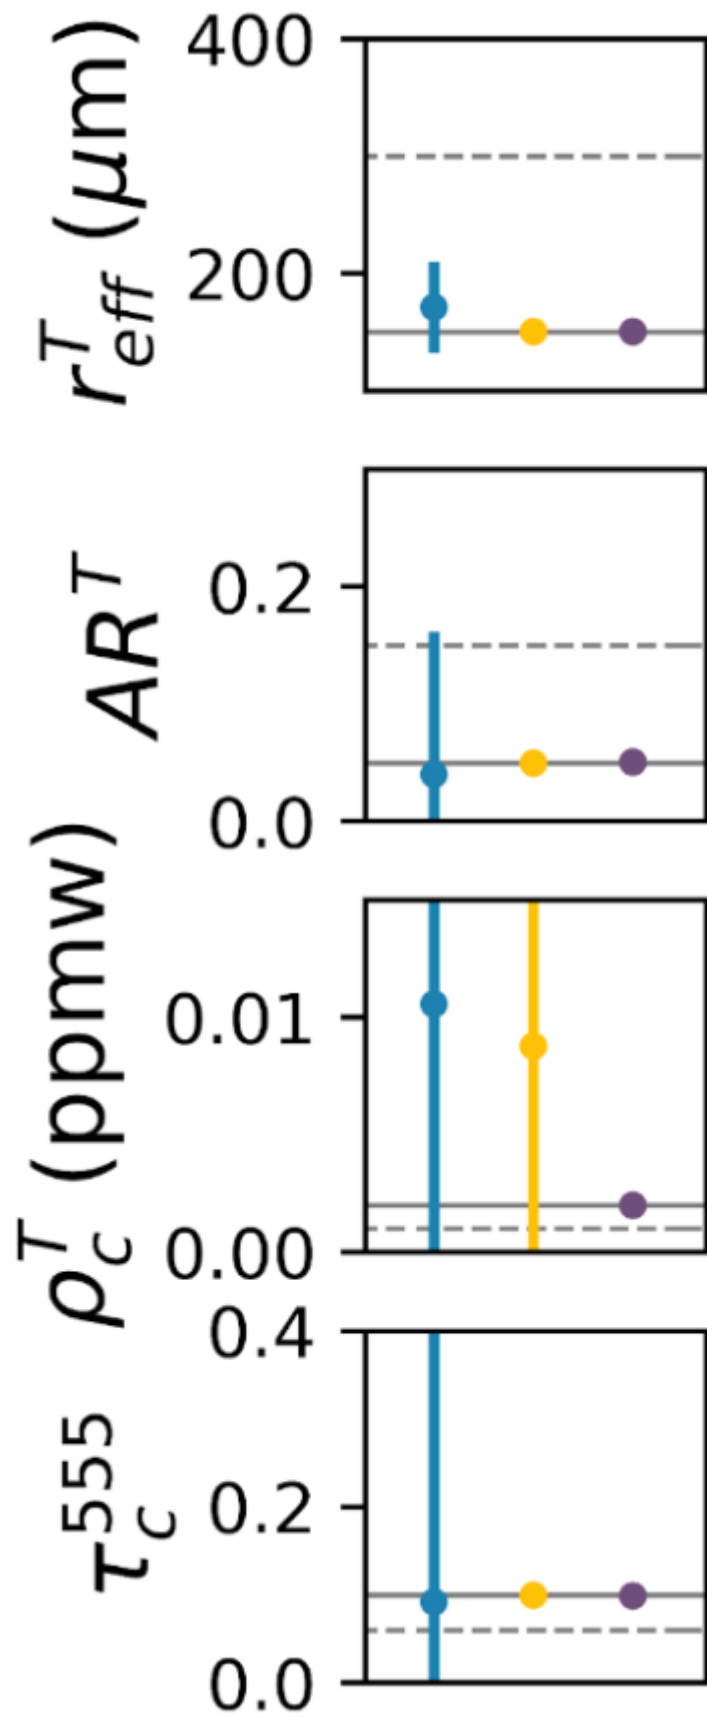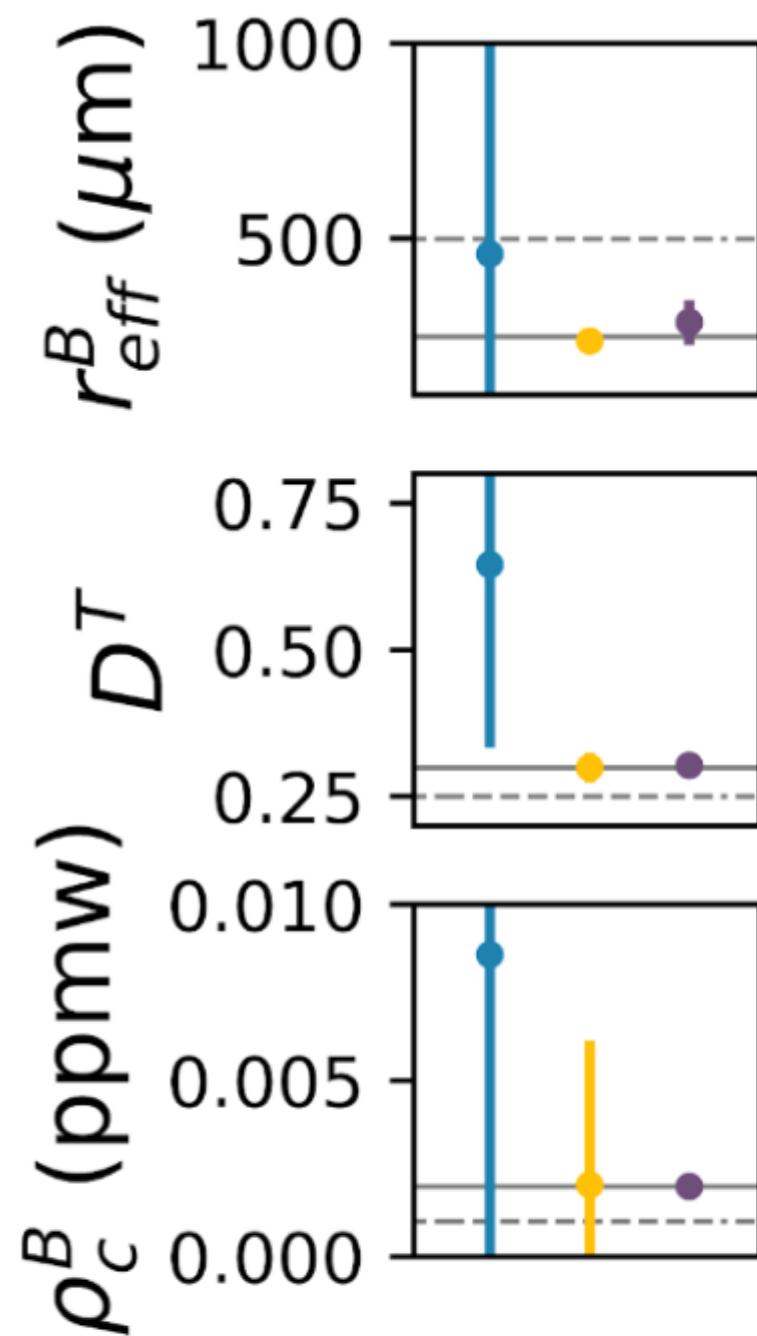

MODIS-like

MODIS+POLDER-like

RSP-like
